# Supplementary material for: Diurnal variation and health risk assessment of anthropogenic VOCs concentrations in Abidjan, Côte d'Ivoire: a comparative study of traffic and domestic fire sites
Source: Research Square preprint supplement (doi:10.21203/rs.3.rs-6596886/v1), 2025-06-06
Supplement: Supplementary file 1 [file 630308fb0ca7a96bc41046d6.docx]

**Supplementary material**

**Table S 1**: Characteristics of VOC Sampling at Domestic Fire and Traffic Sites in Abidjan for Diurnal Monitoring on January 08, 2016.

| Measurement sites | Sample No. | Sample Code | Cartridge Reference | Sampling Times | Number of samples | Air volume (mL) |
| --- | --- | --- | --- | --- | --- | --- |
| Domestic fire site | 1 | AFD1 | P-E GO107665 | 08:00 - 09:30 | 4 | 2400 |
| 2 | AFD2 | Tera env 009240 | 10:00 - 11:30 | 4 | 2400 |
| 3 | AFD3 | Tera env 007623 | 12:00 - 13:30 | 4 | 2400 |
| 4 | AFD4 | Tera env 007636 | 14:00 - 15:30 | 4 | 2400 |
| 5 | AFD5 | Tera env 008562 | 16:00 - 17: 30 | 4 | 2400 |
| 6 | AFD6 | Tera env 009243 | 18:00 - 19:30 | 4 | 2400 |
| Traffic site | 7 | ATT1 | Tera Env 008564 | 08:00 - 09:45 | 8 | 2400 |
| 8 | ATT2 | Tera Env 009239 | 10:00 - 11:45 | 8 | 2400 |
| 9 | ATT3 | Tera Env 113859 | 12:00 - 13:45 | 8 | 2400 |
| 10 | ATT4 | P-E GO95888 | 14:00 - 15:45 | 8 | 2400 |
| 11 | ATT5 | P-E GO141905 | 16:00 - 17:45 | 8 | 2400 |
| 12 | ATT6 | P-E GO94456 | 18:00 - 19:45 | 8 | 2400 |

**Table S 2**: List of Volatile Organic Compounds identified, their chemical formulas and molar masses

| VOC family | VOCs | Molecular formula | Structural formula | Molar mass (g/mol) |
| --- | --- | --- | --- | --- |
| Monoterpenes | Limonene | C10H16 | 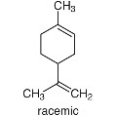 | 136.23 |
| β-Pinene | C10H16 | 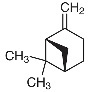 | 136.23 |
| α-Pinene | C10H16 | 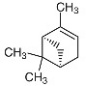 | 136.23 |
| Aromatics | 1,2,3-trimethylbenzene | C9H12 | 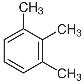 | 120.19 |
| 1,2,4-trimethylbenzene | C9H12 | 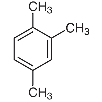 | 120.19 |
| 1,3,5-trimethylbenzene | C9H12 | 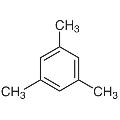 | 120.19 |
| o-xylene | C8H10 | 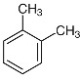 | 106.165 |
| p-xylene | C8H10 | 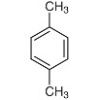 | 106.165 |
| ethylbenzene | C8H10 | 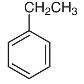 | 106.165 |
| toluene | C7H8 | 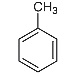 | 92.138 |
| benzene | C6H6 | 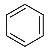 | 78.111 |
| Alkanes | octane | C8H18 | 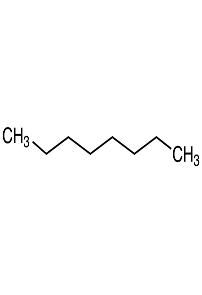 | 114.228 |
| heptane | C7H16 | 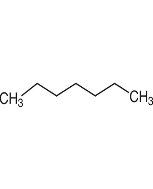 | 100.201 |
| 2,2,4-trimethylpentane | C8H18 | 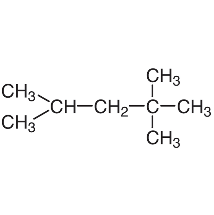 | 114 |
| Alkene | pentene | C5H8 | 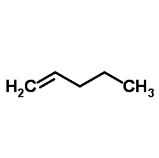 | 70.132 |
| isoprene | C5H8 | 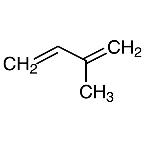 | 68.117 |


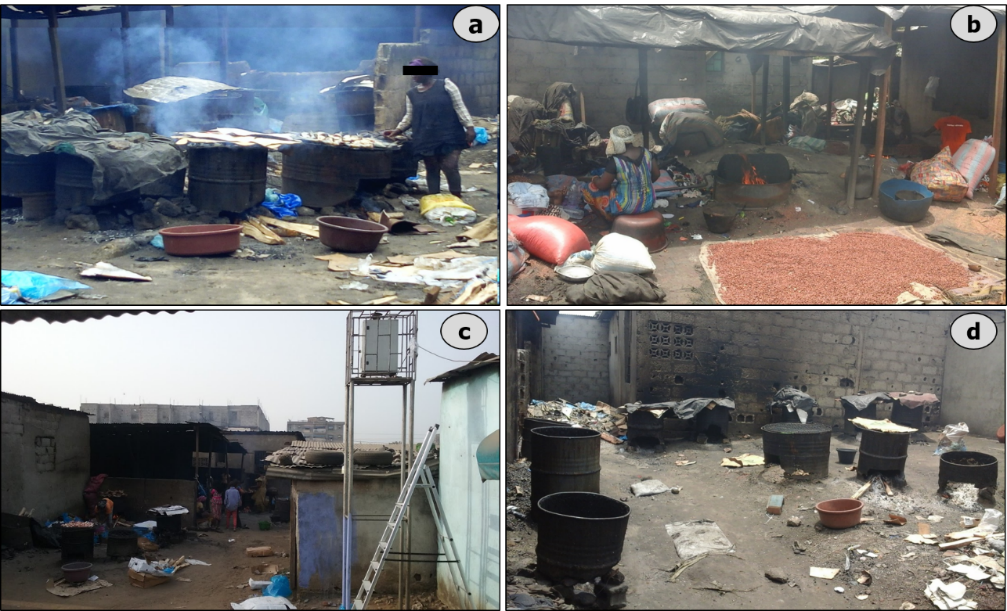


**Fig.S 1:** Activities using firewood at the domestic fire site in Yopougon: a) fish smoking, b) peanut roasting, c) a view of the installed equipment, d) a view of the smoking hearths (Bahino, 2018).


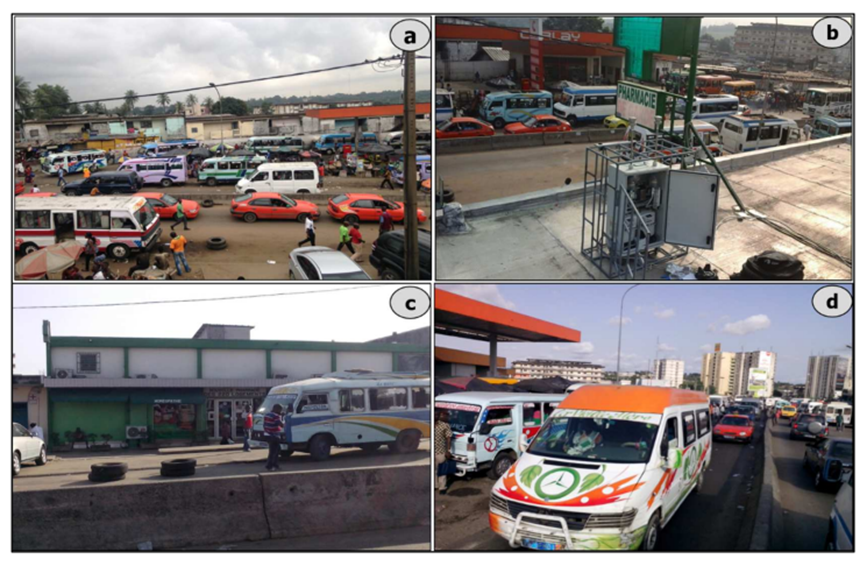


**Fig.S 2**. Traffic site in Adjamé Liberté (Abidjan) (a) View of traffic consisting of metered taxis, gbakas and private vehicles, (b) Measuring instruments on the roof of the 220 logements pharmacy, (c) Front view of the 220 logements pharmacy, (d) gbakas in circulation (Bahino, 2018)


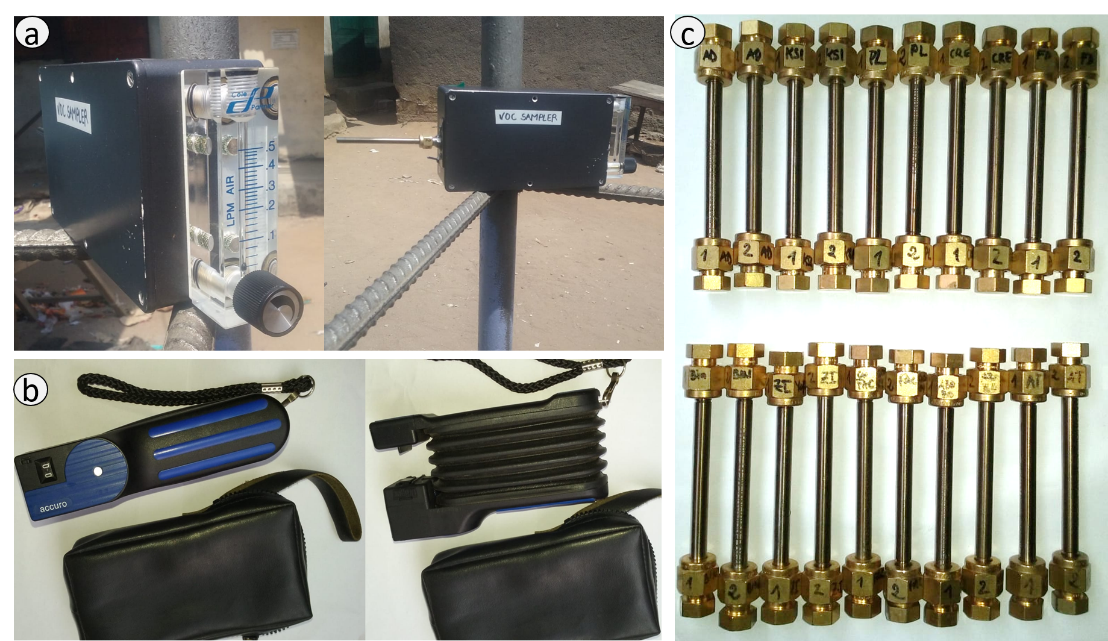


**Fig.S 3** Air sample collection at the Abidjan sites using pumps: (a) electric and (b) manual and (c) VOC cartridge


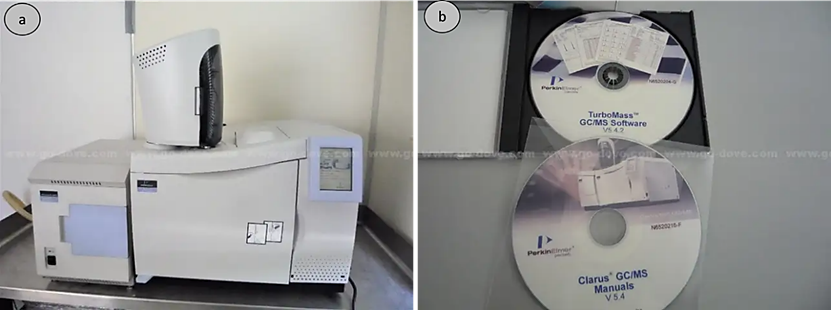


**Fig.S 4**. Analytical setup used for the VOC analysis, showing a) the GC/MS system used for the separation and identification of VOCs and b) the software interface for data acquisition and processing with the Perkin Elmer Clarus system
